# Supplementary material for: Life Cycle Environmental Impact of Underground Plastic Recharge Chambers in Stormwater Management
Source: MDPI journal article supplement (doi:10.3390/buildings12060867), 2022-06-20
Supplement: s1 [file s1]

# Supplementary Materials: Life Cycle Environmental Impact of Underground Plastic Recharge Chambers in Stormwater Management

Lisa A. Peterson, Patricia M. Gallagher and Sabrina Spatari

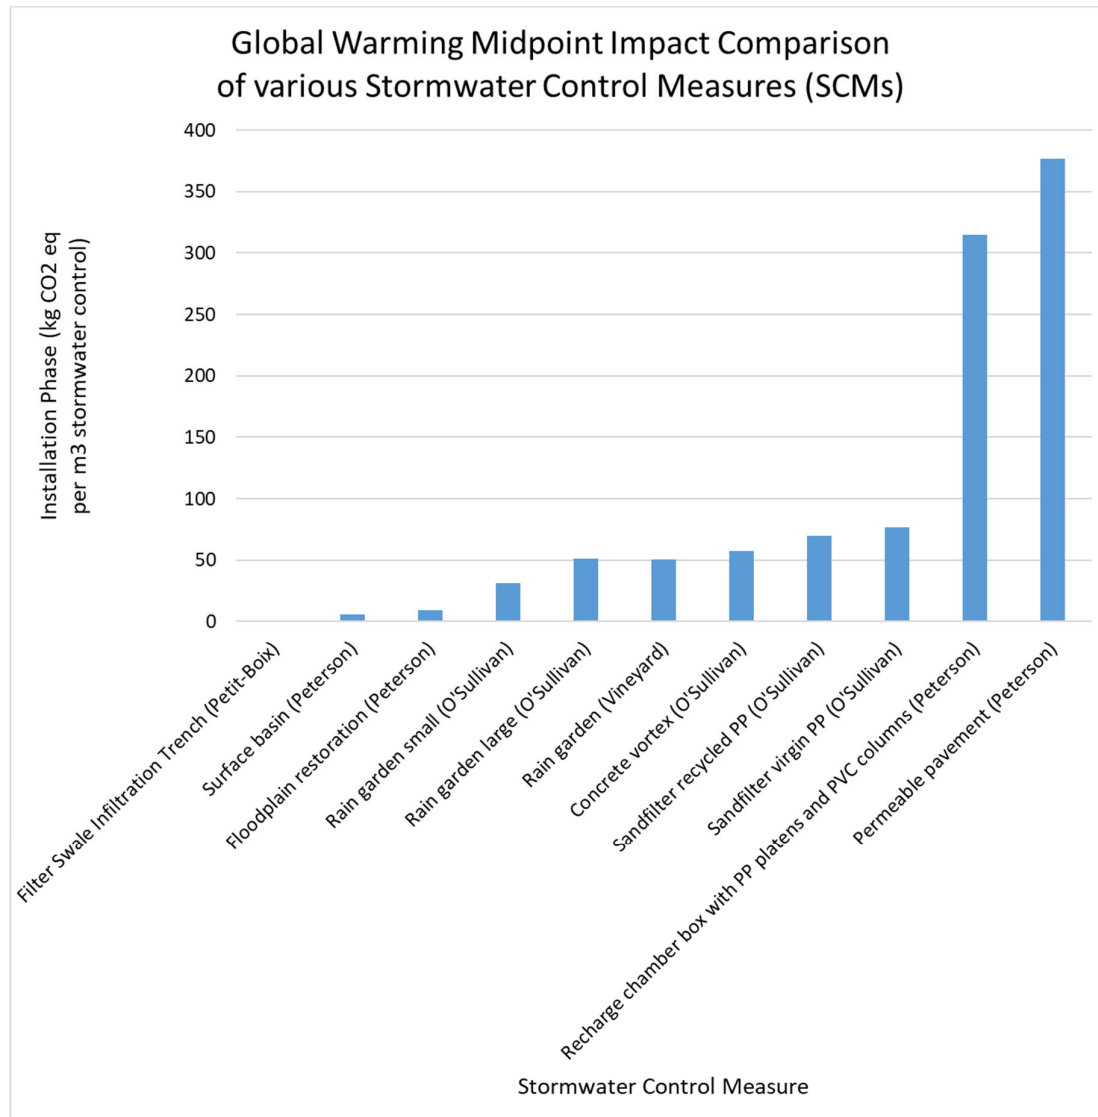

**Figure S1.** Comparison of stormwater management solutions showing a range of up to nearly 400 kg CO<sub>2</sub> eq per cubic meter of managed stormwater [1–4].

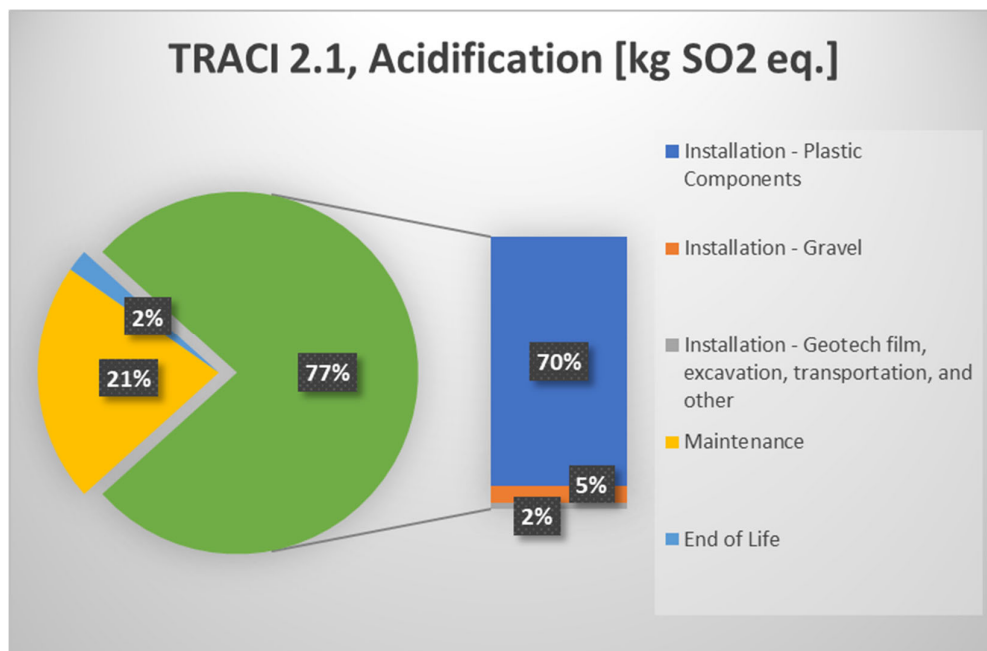

**Figure S2.** Cradle-to-grave LCA for plastic box recharge chamber reveals installation phase as 77% of the life cycle midpoint impact for acidification and the plastic components as 70% of the life cycle or 92% of the installation phase.

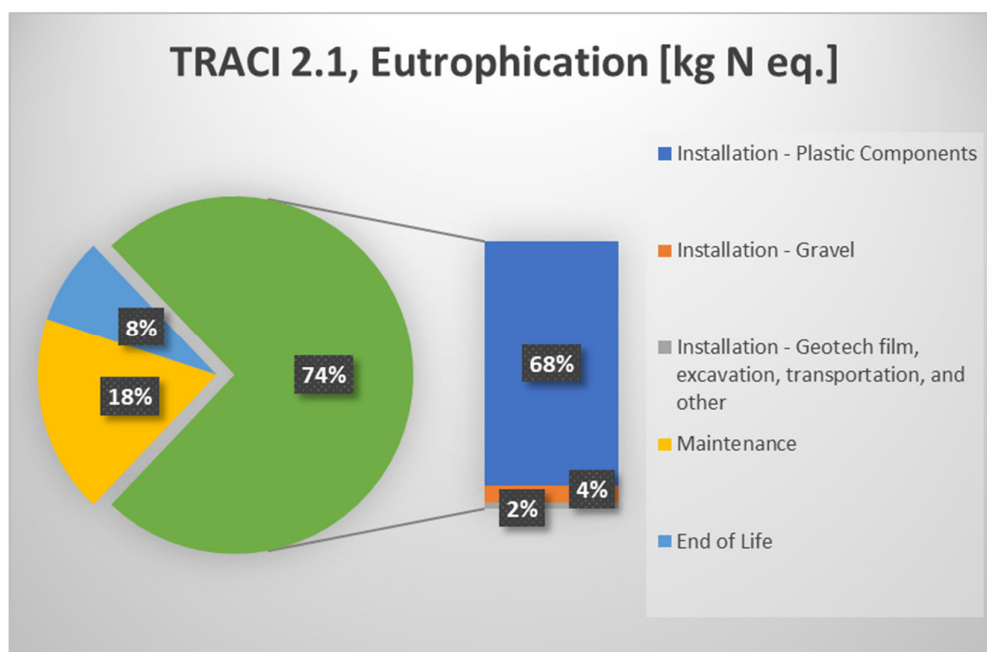

**Figure S3.** Cradle-to-grave LCA for plastic box recharge chamber reveals installation phase as 74% of the life cycle midpoint impact for eutrophication and the plastic components as 68% of the life cycle or 92% of the installation phase.

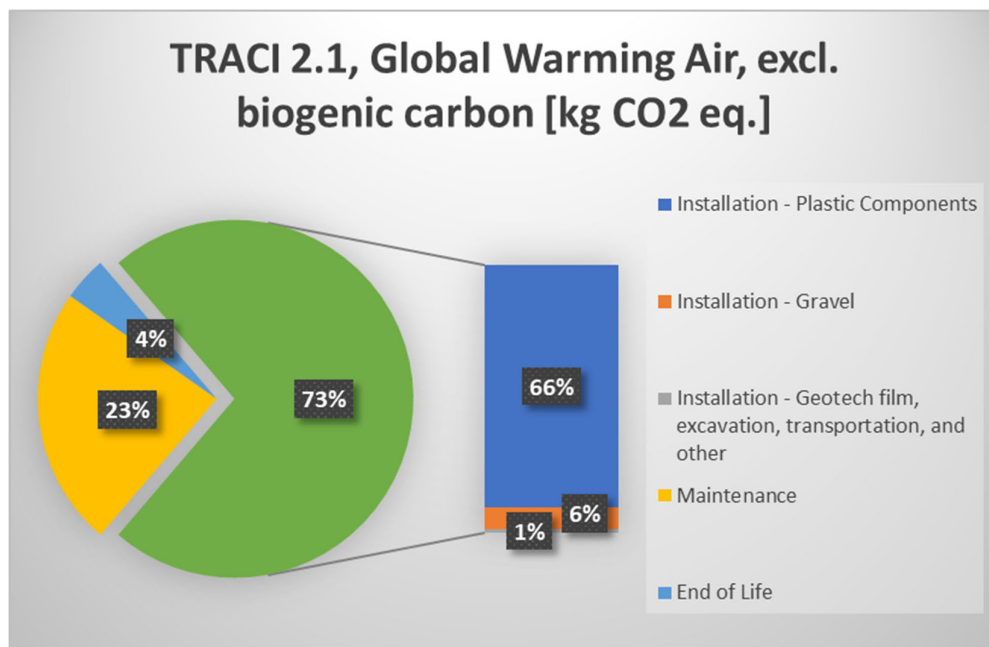

**Figure S4.** Cradle-to-grave LCA for plastic box recharge chamber reveals installation phase as 73% of the life cycle midpoint impact for global warming and the plastic components as 66% of the life cycle or 91% of the installation phase.

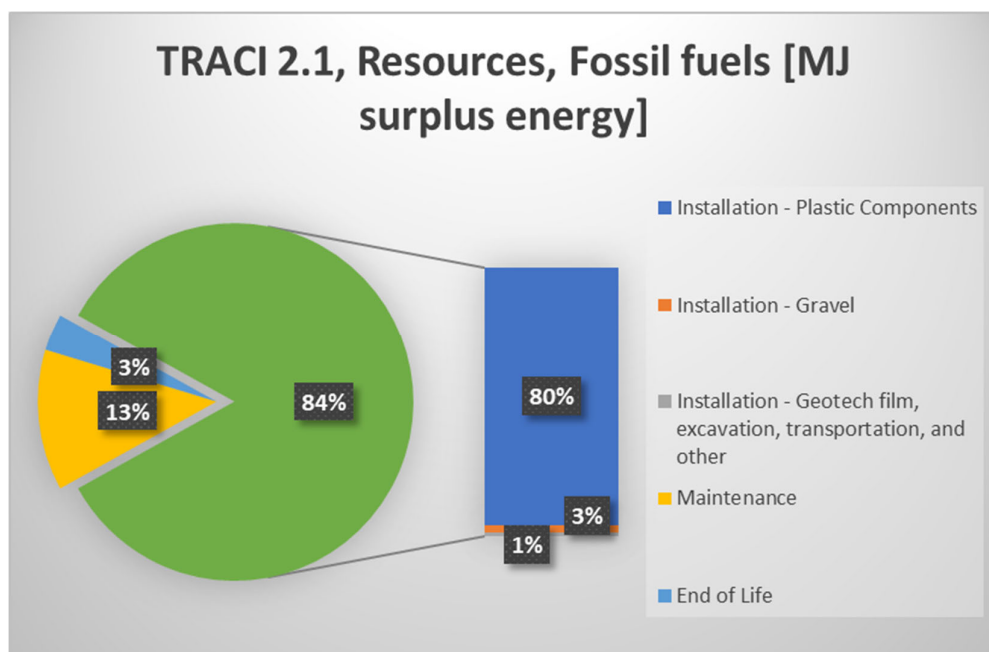

**Figure S5.** Cradle-to-grave LCA for plastic box recharge chamber reveals installation phase as 84% of the life cycle midpoint impact for fossil fuel resources and the plastic components as 80% of the life cycle or 95% of the installation phase.

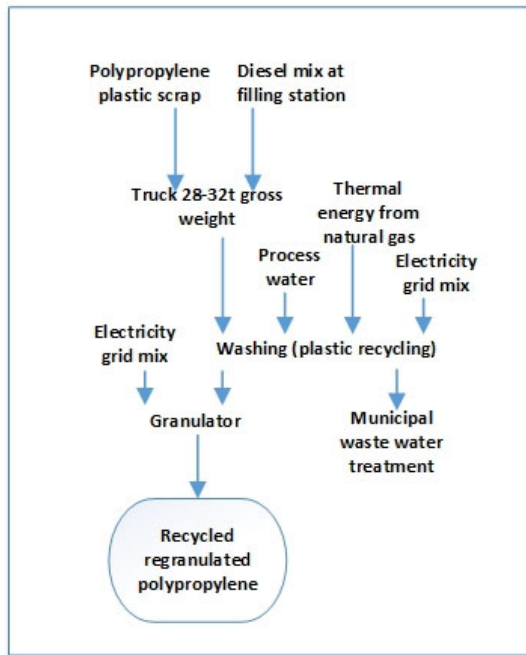

**Figure S6.** System diagram for recycled regranulated polypropylene.

**Table S1.** Recharge chamber plastic box SCMs evaluated (data sourced in 2018).

| Supplier               | Brand Name                 | Material                             | Manufac-turing Process              | Backfill/<br>Covering | Mass (kg/m3<br>storage) | Source |
|------------------------|----------------------------|--------------------------------------|-------------------------------------|-----------------------|-------------------------|--------|
| ACF Environ-<br>mental | R-Tank SD                  | Polypropylene (recycled)             | Injection<br>Molding                | Gravel                | 63.43                   | [5]    |
| ACO                    | StormBrixx                 | Polypropylene (recycled)             | Injection<br>Molding                | Sand                  | 47.28                   | [6]    |
| Atlantis               | Matrix D-<br>Raintank Mini | Polypropylene (recycled)             | Injection<br>Molding                | Gravel or<br>Sand     | 60.55                   | [7]    |
| Atlantis               | Matrix D-<br>Raintank 1    | Polypropylene (recycled)             | Injection<br>Molding                | Gravel or<br>Sand     | 51.58                   | [7]    |
| Atlantis               | Matrix D-<br>Raintank 2    | Polypropylene (recycled)             | Injection<br>Molding                | Gravel or<br>Sand     | 48.69                   | [7]    |
| Atlantis               | Matrix D-<br>Raintank 3    | Polypropylene (recycled)             | Injection<br>Molding                | Gravel or<br>Sand     | 47.70                   | [7]    |
| Atlantis               | Matrix D-<br>Raintank 4    | Polypropylene (recycled)             | Injection<br>Molding                | Gravel or<br>Sand     | 49.34                   | [7]    |
| Atlantis               | Matrix D-<br>Raintank 5    | Polypropylene (recycled)             | Injection<br>Molding                | Gravel or<br>Sand     | 67.54                   | [7]    |
| Brentwood<br>StormTank | StormTank                  | Polypropylene &<br>Polyvinylchloride | Injection<br>Molding &<br>Extrusion | Gravel                | 39.78                   | [8]    |
| Brentwood<br>StormTank | StormTank                  | Polypropylene &<br>Polyvinylchloride | Injection<br>Molding &<br>Extrusion | Gravel                | 37.08                   | [8]    |
| Brentwood<br>StormTank | StormTank                  | Polypropylene &<br>Polyvinylchloride | Injection<br>Molding &<br>Extrusion | Gravel                | 34.80                   | [8]    |
| Brentwood<br>StormTank | StormTank                  | Polypropylene &<br>Polyvinylchloride | Injection<br>Molding &<br>Extrusion | Gravel                | 33.56                   | [8]    |
| EcoRain                | Eco-Rain Tank<br>ET-1500   | Polypropylene (recycled)             | Injection<br>Molding                | Gravel                | 51.42                   | [9]    |
| EcoRain                | Eco-Rain Tank<br>ET-1501   | Polypropylene (recycled)             | Injection<br>Molding                | Gravel                | 48.13                   | [9]    |
| EcoRain                | Eco-Rain Tank<br>ET-1501.5 | Polypropylene (recycled)             | Injection<br>Molding                | Gravel                | 45.75                   | [9]    |
| EcoRain                | Eco-Rain Tank<br>ET-1502   | Polypropylene (recycled)             | Injection<br>Molding                | Gravel                | 45.26                   | [9]    |
| EcoRain                | Eco-Rain Tank<br>ET-1502.5 | Polypropylene (recycled)             | Injection<br>Molding                | Gravel                | 44.38                   | [9]    |
| EcoRain                | Eco-Rain Tank<br>ET-1503   | Polypropylene (recycled)             | Injection<br>Molding                | Gravel                | 44.28                   | [9]    |
| EcoRain                | Eco-Rain Tank<br>ET-1503.5 | Polypropylene (recycled)             | Injection<br>Molding                | Gravel                | 43.75                   | [9]    |
| EcoRain                | Eco-Rain Tank<br>ET-1504   | Polypropylene (recycled)             | Injection<br>Molding                | Gravel                | 43.78                   | [9]    |
| EcoRain                | Eco-Rain Tank<br>ET-1504.5 | Polypropylene (recycled)             | Injection<br>Molding                | Gravel                | 43.45                   | [9]    |
| EcoRain                | Eco-Rain Tank<br>ET-1505   | Polypropylene (recycled)             | Injection<br>Molding                | Gravel                | 43.47                   | [9]    |

|                   |                 |                          |                   |        |       |      |
|-------------------|-----------------|--------------------------|-------------------|--------|-------|------|
| Greening Solution | GS-tanks M2014  | Polypropylene (recycled) | Injection Molding | Sand   | 66.67 | [10] |
| Greening Solution | GS-tanks M2015H | Polypropylene (recycled) | Injection Molding | Sand   | 76.53 | [10] |
| Greening Solution | GS-tanks M2015F | Polypropylene (recycled) | Injection Molding | Sand   | 61.06 | [10] |
| Greening Solution | GS-tanks M2016S | Polypropylene (recycled) | Injection Molding | Sand   | 63.29 | [10] |
| Greening Solution | GS-tanks M2016B | Polypropylene (recycled) | Injection Molding | Sand   | 56.25 | [10] |
| NidaPlast         | AZbox           | Polypropylene            | Injection Molding | Gravel | 84.85 | [11] |
| NidaPlast         | Nidaflow EP500  | Polypropylene            | Extrusion         | Gravel | 40.00 | [11] |
| NidaPlast         | Nidaflow EP600  | Polypropylene            | Extrusion         | Gravel | 44.00 | [11] |
| Wavin             | Q-Bic Plus      | Polypropylene            | Injection Molding | Sand   | 43.22 | [12] |

**Table S2.** Recharge chamber plastic arch SCMs evaluated. Note that the typical process is structural foam polypropylene or gas-assisted injection molding polypropylene. For LCA process modeling, the injection molding process is used as a proxy for these detailed variants of processing. (Data sourced in 2018.)

| Supplier    | Brand Name                   | Material      | Manufacturing Process | Backfill/Covering | Mass (kg/m3 storage) | Source |
|-------------|------------------------------|---------------|-----------------------|-------------------|----------------------|--------|
| ADS         | StormTech SC-160LP           | Polypropylene | Injection Molding     | Gravel            | 25.95                | [13]   |
| ADS         | StormTech SC-310             | Polypropylene | Injection Molding     | Gravel            | 19.09                | [13]   |
| ADS         | StormTech SC-740             | Polypropylene | Injection Molding     | Gravel            | 15.85                | [13]   |
| Contech     | ChamberMaxx                  | Polypropylene | Injection Molding     | Gravel            | 15.54                | [14]   |
| Graf        | EcoBloc Infil-tration Tunnel | Polypropylene | Injection Molding     | Gravel            | 36.67                | [15]   |
| Prinsco     | Hydro Stor HS180             | Polypropylene | Injection Molding     | Gravel            | 15.09                | [16]   |
| Prinsco     | Hydro Stor HS180             | Polypropylene | Injection Molding     | Gravel            | 11.30                | [16]   |
| Stormkeeper | StormKeeper Chamber SK75     | Polypropylene | Injection Molding     | Gravel            | 15.09                | [17]   |
| Stormkeeper | StormKeeper Chamber SK180    | Polypropylene | Injection Molding     | Gravel            | 11.30                | [17]   |

**Table S3.** Densities of inventory items for conversion from volume or area to mass.

| Inventory item        | Density        | Source |
|-----------------------|----------------|--------|
| Moist excavated earth | 1442 kg per m3 | [18]   |
| Geotextile fabric     | 0.15 kg per m2 | [19]   |
| Gravel                | 1602 kg per m3 | [18]   |
| Sand                  | 1602 kg per m3 | [18]   |

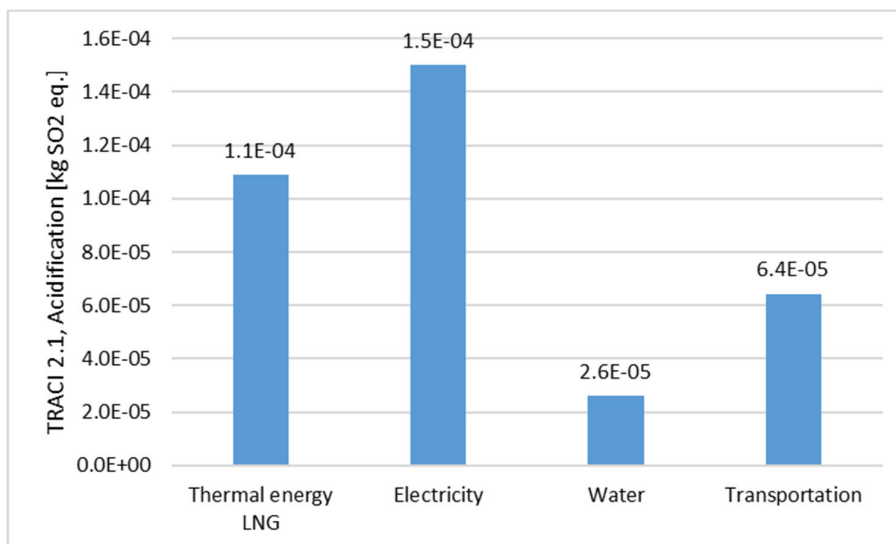

**Figure S7.** Acidification impact assessment shows the dominance of electricity and thermal energy from natural gas in the polypropylene recycling process, with an impact of 3.5E-4 kg SO<sub>2</sub> eq per 1kg recycled polypropylene granulate. Virgin polypropylene has an impact of 2.7E-3 kg SO<sub>2</sub> eq per 1kg.

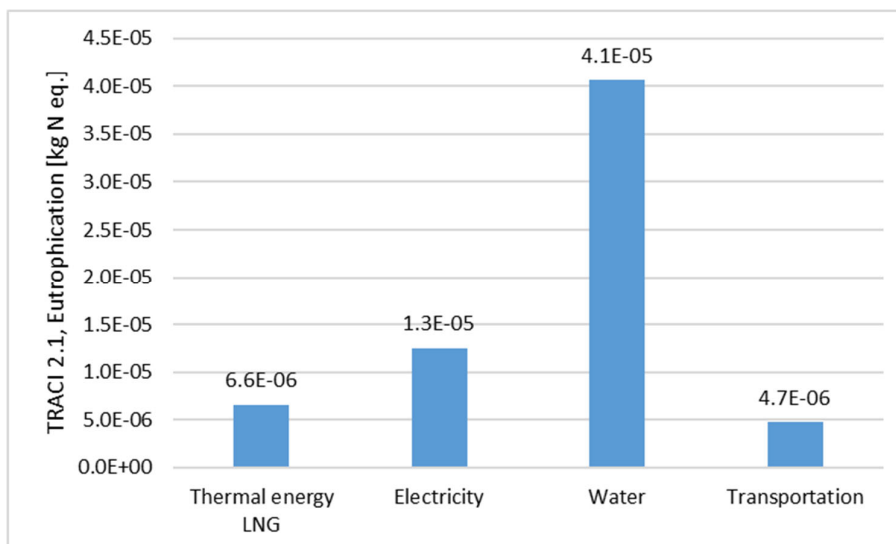

**Figure S8.** Eutrophication impact assessment shows the dominance of water in the polypropylene recycling process, with an impact of 6.5E-5 kg N eq per 1kg recycled polypropylene granulate. Virgin polypropylene has an impact of 2E-4 kg N eq per 1kg.

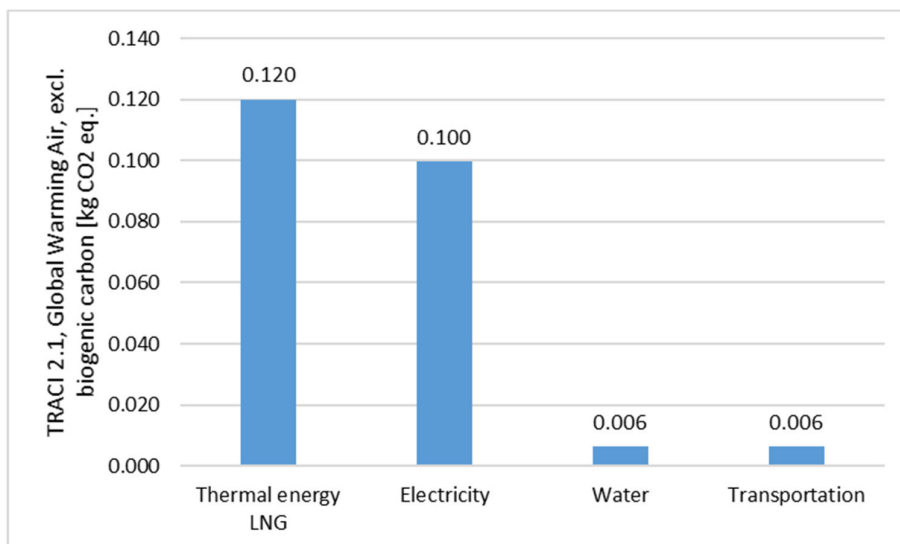

**Figure S9.** Global warming impact assessment shows the dominance of thermal energy from natural gas and electricity in the polypropylene recycling process, with an impact of 0.23kg CO<sub>2</sub> eq per 1kg recycled polypropylene granulate. Virgin polypropylene has an impact of 1.66 kg CO<sub>2</sub> eq per 1kg.

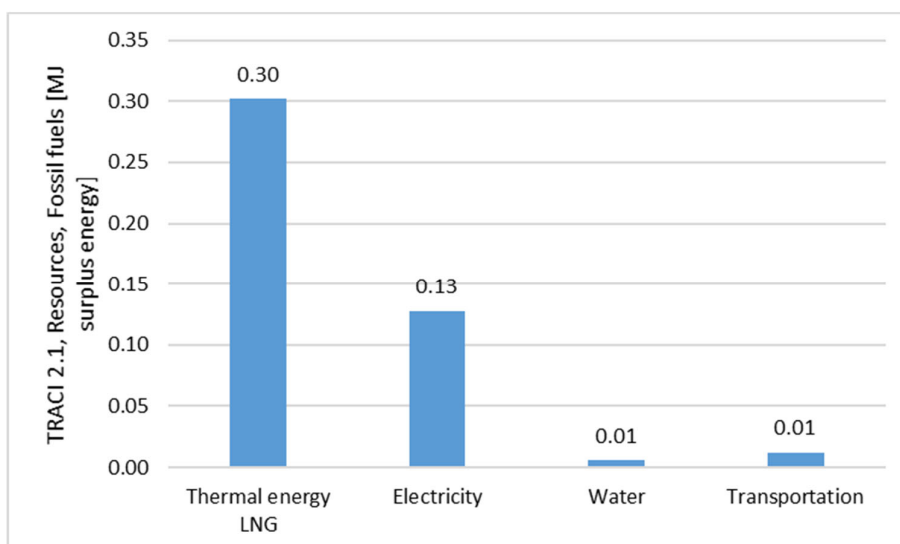

**Figure S10.** Fossil fuel resources impact assessment shows the dominance of thermal energy from natural gas and electricity in the polypropylene recycling process, with an impact of 0.45 MJ surplus energy per 1kg recycled polypropylene granulate. Virgin polypropylene has an impact of 9.39 MJ surplus energy per 1kg.

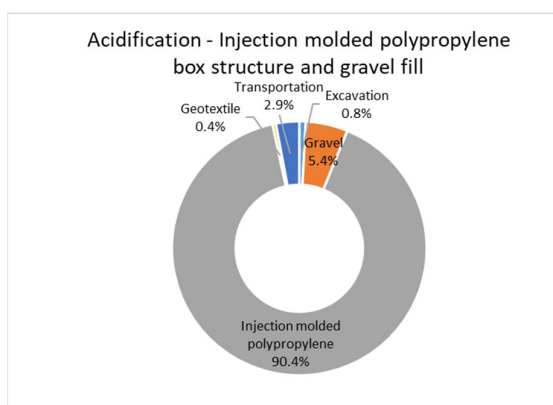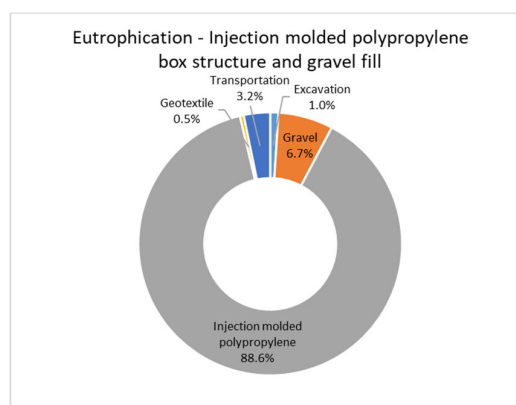



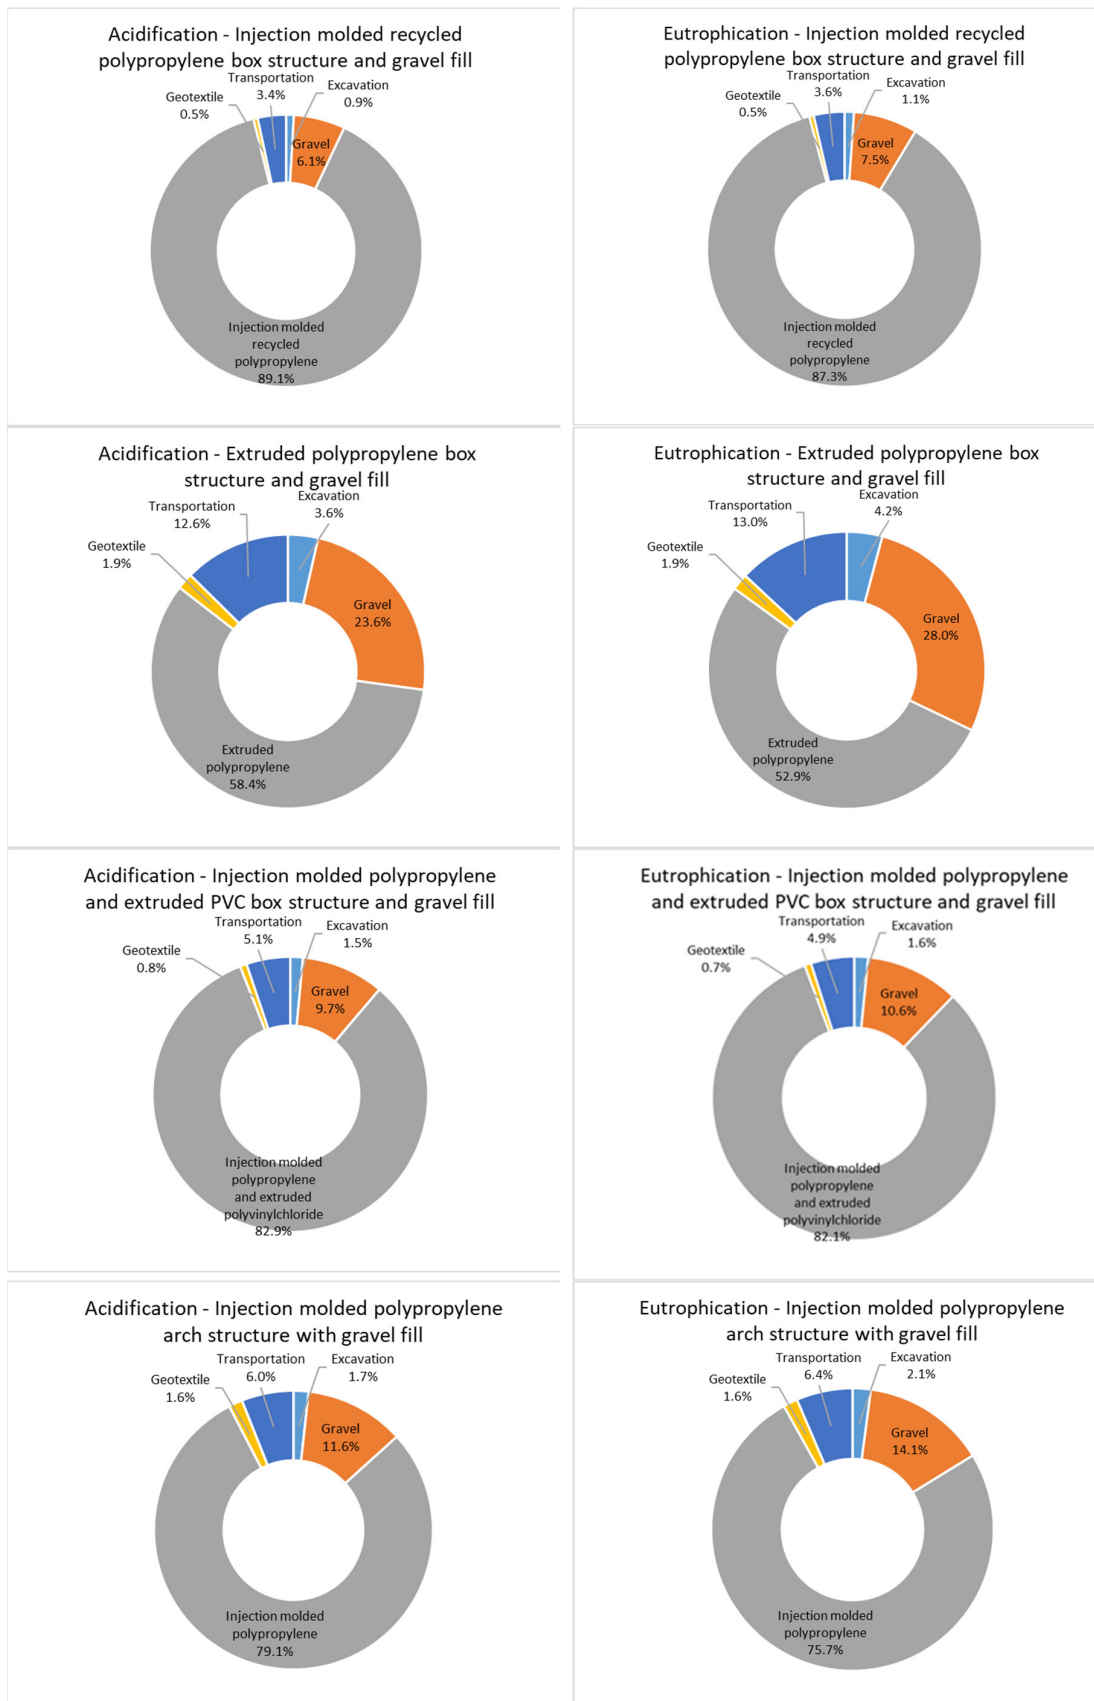

**Figure S11.** Sunburst charts show the plastic components as more than 50% of the acidification and eutrophication midpoint impact followed by the backfill material for each of the material and process alternatives. The plastic components in the extruded polypropylene box represent the lowest acidification and

eutrophication midpoint impact at 58% and 52%, respectively, with the gravel backfill representing 23% and 28 %, respectively.

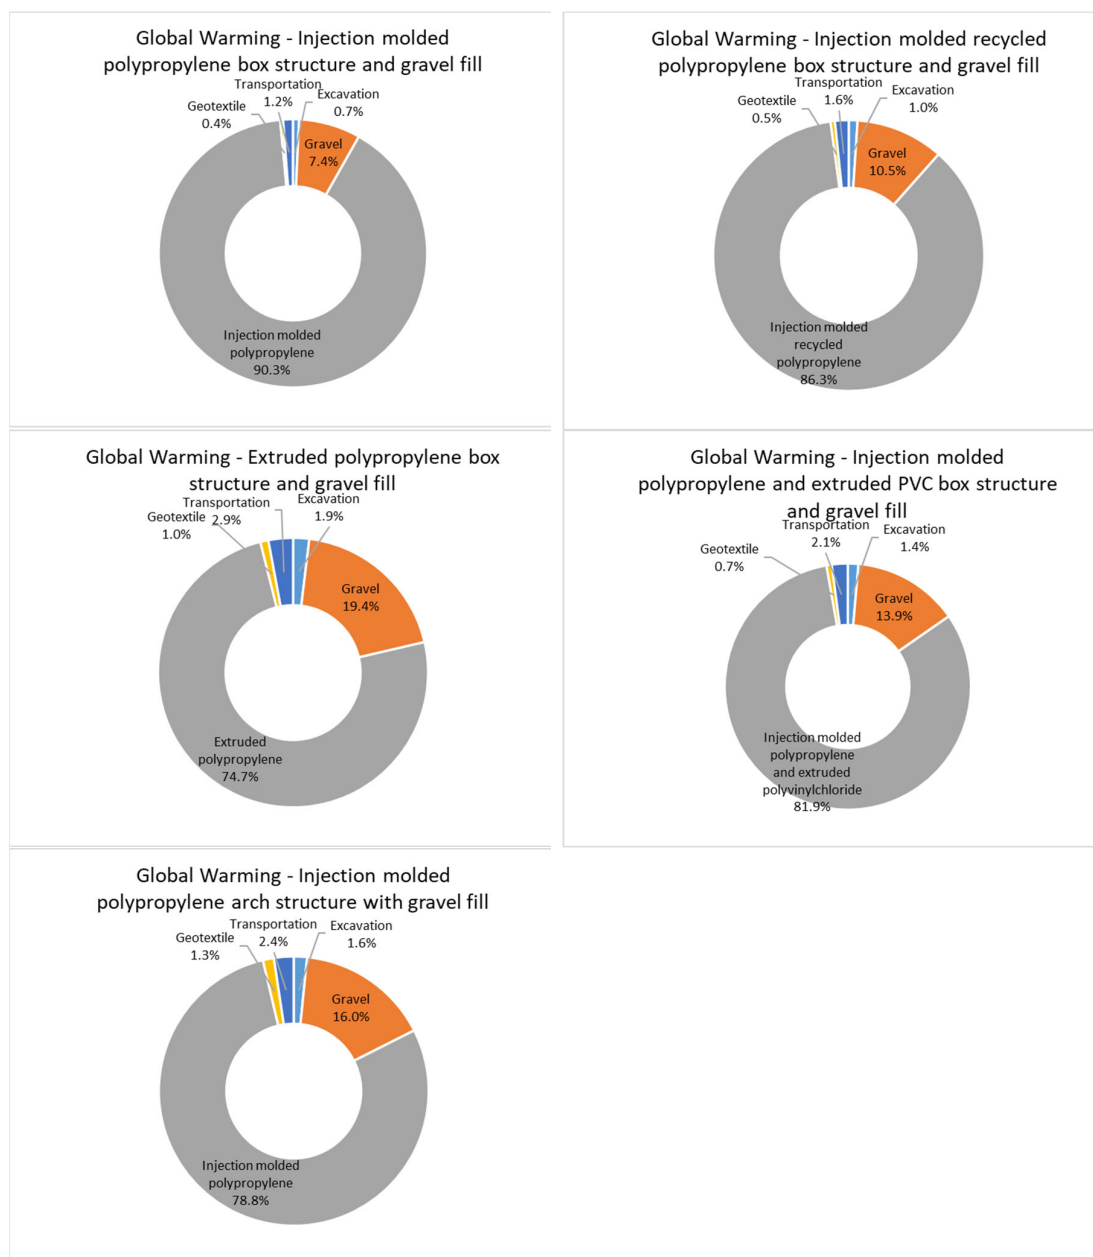

**Figure S12.** Sunburst charts show the plastic components as approximately 75-90% and backfill material as 7-20% of the global warming midpoint impact for each of the material and process alternatives.

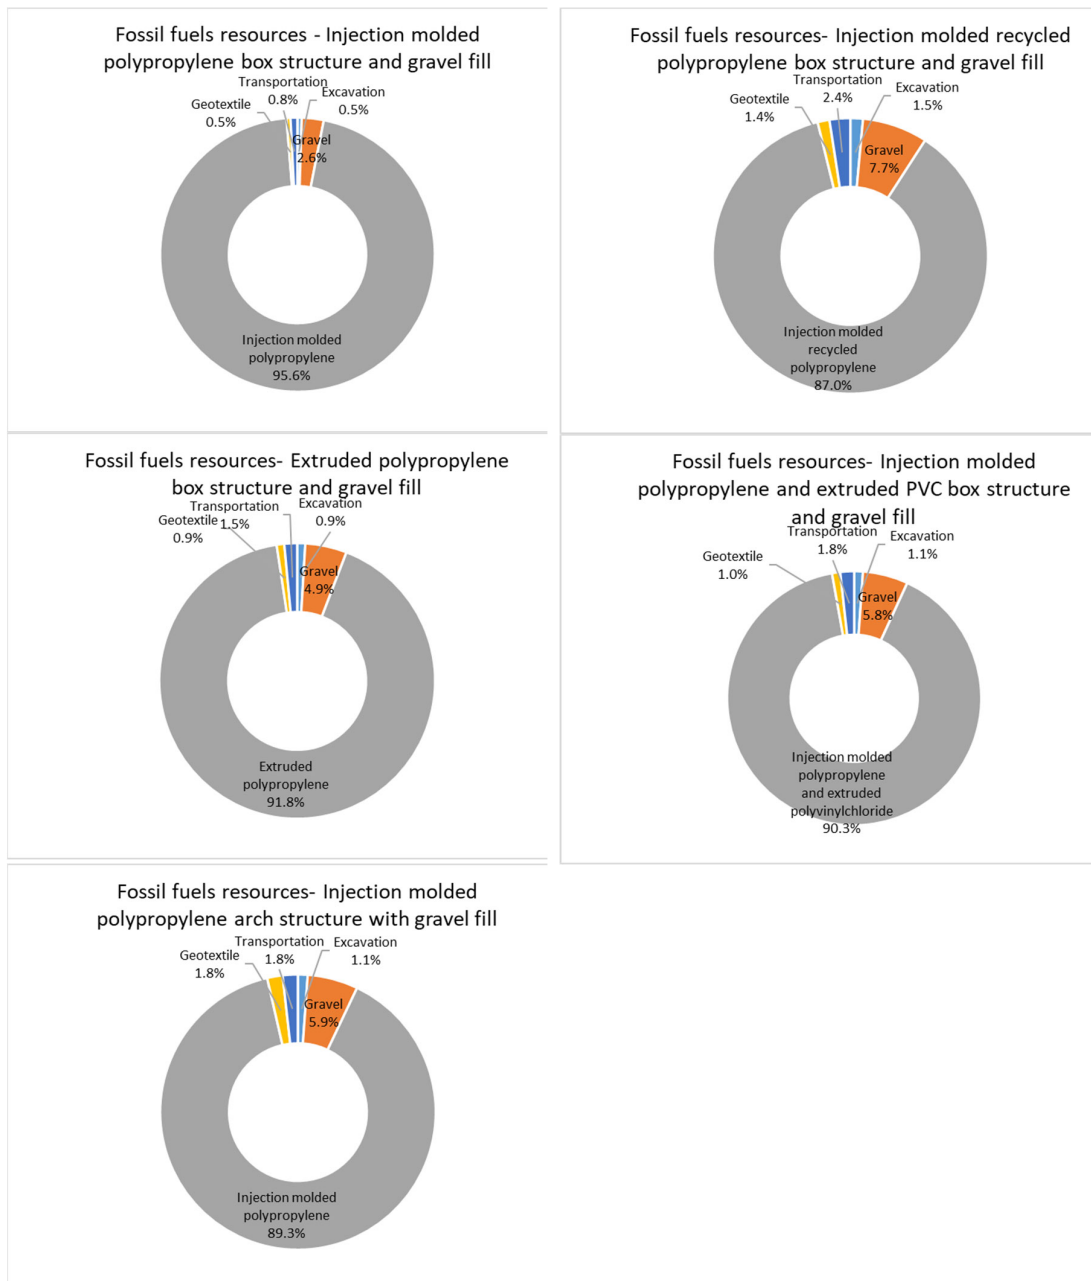

**Figure S13.** Sunburst charts show the plastic components as approximately 87-96% and backfill material as 2-8% of the fossil fuels resources mid-point impact for each of the material and process alternatives.

**Table S4.**

| Impact Category                                   | Structure | Range      | Plastic Structure | Transportation | Backfill | Excavation | Geotextile |
|---------------------------------------------------|-----------|------------|-------------------|----------------|----------|------------|------------|
| TRACI 2.1, Acidification (kg SO <sub>2</sub> eq.) | Box       | Min        | 1.6E-01           | 4.3E-03        | 2.3E-03  | 5.5E-03    | 1.8E-03    |
|                                                   |           | Base Model | 5.7E-01           | 3.5E-02        | 6.7E-02  | 1.0E-02    | 5.5E-03    |
|                                                   |           | Max        | 1.5E+00           | 6.9E-01        | 1.3E-01  | 1.5E-02    | 9.3E-03    |
|                                                   | Arch      | Min        | 2.0E-01           | 1.0E-02        | 2.0E-02  | 5.5E-03    | 6.4E-03    |
|                                                   |           | Base Model | 4.2E-01           | 3.2E-02        | 6.2E-02  | 9.3E-03    | 8.5E-03    |
|                                                   |           | Max        | 6.5E-01           | 5.4E-01        | 1.0E-01  | 1.3E-02    | 1.0E-02    |
|                                                   | Box       | Min        | 1.0E-02           | 3.2E-04        | 1.5E-04  | 4.5E-04    | 1.3E-04    |
|                                                   |           | Base Model | 4.3E-02           | 2.6E-03        | 5.6E-03  | 8.3E-04    | 3.9E-04    |

|                                                                               |      |            |         |         |         |         |         |
|-------------------------------------------------------------------------------|------|------------|---------|---------|---------|---------|---------|
| TRACI 2.1,<br>Eutrophication<br>(kg N eq.)                                    | Arch | Max        | 9.8E-02 | 5.0E-02 | 1.1E-02 | 1.2E-03 | 6.6E-04 |
|                                                                               |      | Min        | 1.3E-02 | 7.6E-04 | 1.6E-03 | 4.5E-04 | 4.5E-04 |
|                                                                               |      | Base Model | 2.8E-02 | 2.3E-03 | 5.2E-03 | 7.7E-04 | 6.0E-04 |
|                                                                               |      | Max        | 4.2E-02 | 3.9E-02 | 8.7E-03 | 1.1E-03 | 7.4E-04 |
| TRACI 2.1,<br>Global Warming<br>Air, excl. biogenic<br>carbon (kg CO2<br>eq.) | Box  | Min        | 85.4    | 0.4     | 0.3     | 1.3     | 0.4     |
|                                                                               |      | Base Model | 136.9   | 3.5     | 23.3    | 2.3     | 1.2     |
|                                                                               |      | Max        | 375.2   | 68.0    | 44.8    | 3.4     | 1.9     |
|                                                                               | Arch | Min        | 49.9    | 1.0     | 6.8     | 1.3     | 1.3     |
|                                                                               |      | Base Model | 106.0   | 3.2     | 21.5    | 2.1     | 1.8     |
|                                                                               |      | Max        | 162.0   | 53.2    | 36.2    | 3.0     | 2.2     |
| TRACI 2.1,<br>Resources, Fossil<br>fuels (MJ surplus<br>energy)               | Box  | Min        | 170.0   | 0.8     | 0.5     | 2.3     | 1.3     |
|                                                                               |      | Base Model | 347.9   | 6.8     | 22.2    | 4.3     | 4.0     |
|                                                                               |      | Max        | 1092.4  | 131.5   | 42.7    | 6.2     | 6.8     |
|                                                                               | Arch | Min        | 145.5   | 2.0     | 6.5     | 2.3     | 4.7     |
|                                                                               |      | Base Model | 309.0   | 6.2     | 20.5    | 3.9     | 6.3     |
|                                                                               |      | Max        | 472.1   | 103.2   | 34.5    | 5.5     | 7.7     |

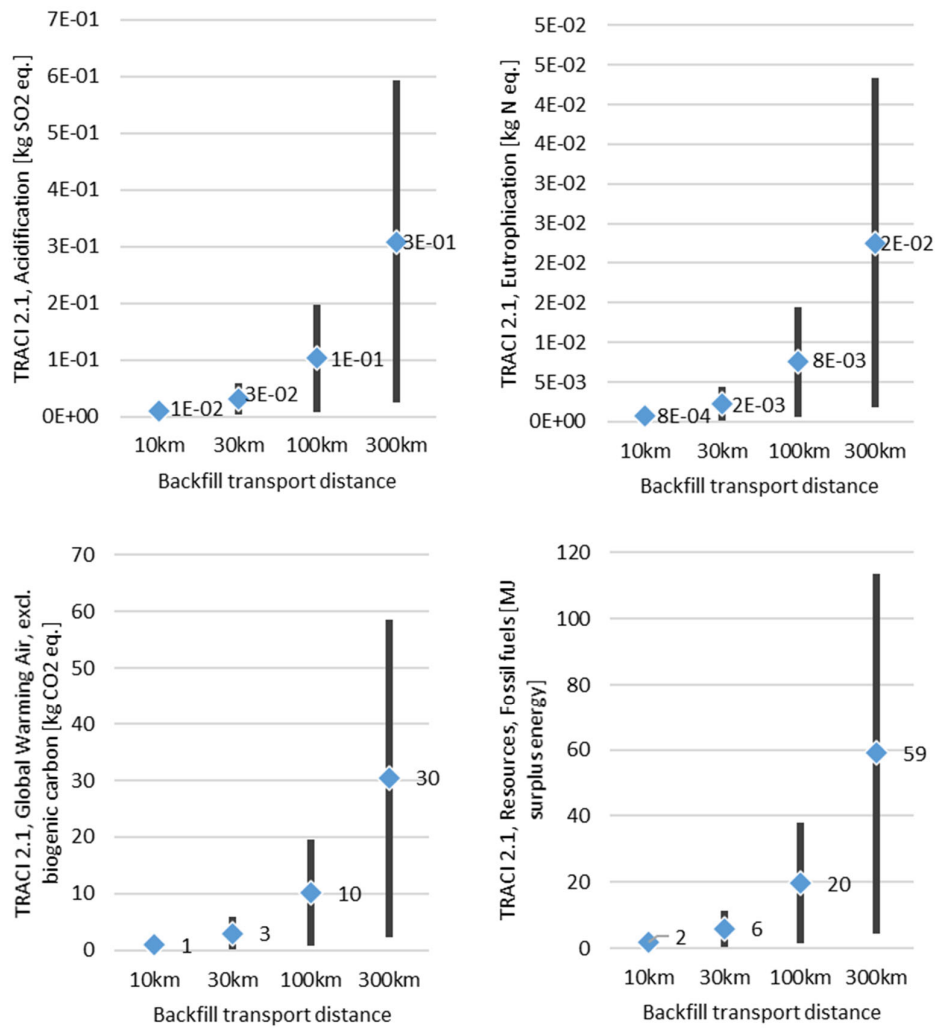

**Figure S14.** Midpoint impact of arch backfill transportation distance shows the increase in potential impact with additional distance of transport.

## References

1. O'Sullivan, A.D., et al., *Life Cycle Assessment modelling of stormwater treatment systems*. Journal of Environmental Management, 2015. **149**: p. 236-244.
2. Vineyard, D., et al., *Comparing Green and Grey Infrastructure Using Life Cycle Cost and Environmental Impact: A Rain Garden Case Study in Cincinnati, OH*. Journal of the American Water Resources Association, 2015. **51**(5): p. 1342-1360.
3. Petit-Boix, A., et al., *Environmental and economic assessment of a pilot stormwater infiltration system for flood prevention in Brazil*. Ecological Engineering, 2015. **84**: p. 194-201.
4. Peterson, L.A., P.M. Awerbuch, and S. Spatari, *Environmental and economic implications of stormwater management alternatives in rural development*. Journal of Industrial Ecology, 2021. **24**(4): p. 1076-1088.
5. ACF Environmental. 2017; Available from: [www.acfenvironmental.com](http://www.acfenvironmental.com).
6. ACO Stormbrixx. 2017; Available from: [www.acostormbrixx.us](http://www.acostormbrixx.us).
7. Atlantis. 2017; Available from: [www.rainharvest.com/atlantis-d-raintank-modular-rainwater-storage-system.asp](http://www.rainharvest.com/atlantis-d-raintank-modular-rainwater-storage-system.asp).
8. Brentwood StormTank. 2017; Available from: [www.brentwoodindustries.com/stormwater-management](http://www.brentwoodindustries.com/stormwater-management).
9. EcoRain. 2017; Available from: [www.ecorain.com](http://www.ecorain.com).
10. Greening Solution. 2017; Available from: [www.greening-solution.com](http://www.greening-solution.com).
11. NidaPlast. 2017; Available from: [www.nidaplast.com/en-uk](http://www.nidaplast.com/en-uk).
12. Wavin Q-Bic Plus. 2017; Available from: [www.wavin.co.uk](http://www.wavin.co.uk).
13. ADS Storm Tech. 2017; Available from: [www.stormtech.com](http://www.stormtech.com).
14. Contech Engineered Solutions. 2017; Available from: <http://www.conteches.com/>.
15. Graf EcoBloc. 2017; Available from: [www.graf-water.com](http://www.graf-water.com).
16. Prinsco HydroStor. 2017; Available from: [www.prinsco.com](http://www.prinsco.com).
17. StormKeeper. 2017; Available from: [www.laneenterprises.com](http://www.laneenterprises.com).
18. Walker, R. *Density of Bulk Materials*. 2016; Available from: [https://www.simetric.co.uk/si\\_materials.htm](https://www.simetric.co.uk/si_materials.htm).
19. Wallbarn Geotextiles. 2017; Available from: <https://www.wallbarn.com/geotextiles/>.
